1 **Mechanotaxis directs *Pseudomonas aeruginosa***  
2 **twitching motility**

3

4 **Authors:**

5 Marco J. Kühn†<sup>1</sup>, Lorenzo Talà†<sup>1</sup>, Yuki Inclan<sup>2</sup>, Ramiro Patino<sup>2</sup>, Xavier Pierrat<sup>1</sup>,  
6 Iscia Vos<sup>1,3</sup>, Zainebe Al-Mayyah<sup>1</sup>, Henriette MacMillan<sup>2</sup>, Jose Negrete<sup>1,3</sup>, Joanne N.  
7 Engel<sup>\*,2</sup> and Alexandre Persat<sup>\*,1</sup>

8

9 **Affiliations:**

10 <sup>1</sup>Institute of Bioengineering and Global Health Institute, School of Life Sciences,  
11 EPFL, Lausanne, Switzerland

12 <sup>2</sup>Department of Microbiology and Immunology, University of California, San  
13 Francisco, USA

14 <sup>3</sup>Institute of Physics, School of Basic Sciences, EPFL, Lausanne, Switzerland

15

16 \*Corresponding authors

17 †These authors contributed equally

18        **Abstract**

19        The opportunistic pathogen *Pseudomonas aeruginosa* explores surfaces using  
20        twitching motility powered by retractile extracellular filaments called type IV pili.  
21        Single cells twitch by successive pili extension, attachment and retraction. However,  
22        whether and how single cells control twitching migration remains unclear. We  
23        discovered that *P. aeruginosa* actively directs twitching in the direction of mechanical  
24        input from type IV pili, in a process we call mechanotaxis. The Chp chemotaxis-like  
25        system controls the balance of forward and reverse twitching migration of single cells  
26        in response to the mechanical signal. On surfaces, Chp senses type IV pili  
27        attachment at one pole thereby sensing a spatially-resolved signal. As a result, the  
28        Chp response regulators PilG and PilH control the polarization of the extension  
29        motor PilB. PilG stimulates polarization favoring forward migration, while PilH inhibits  
30        polarization inducing reversal. Subcellular segregation of PilG and PilH efficiently  
31        orchestrates their antagonistic functions, ultimately enabling rapid reversals upon  
32        perturbations. This distinct localization of response regulators establishes a signaling  
33        landscape known as local-excitation, global-inhibition in higher order organisms,  
34        identifying a conserved strategy to transduce spatially-resolved signals. Our  
35        discovery finally resolves the function of the Chp system and expands our view of  
36        the signals regulating motility.

## 37 Introduction

38 Single-cell organisms have evolved motility machineries to explore their  
39 environments. For example, bacteria utilize swimming motility to propel themselves  
40 through fluids. In their natural environments, bacteria are however most commonly  
41 found associated to surfaces<sup>1</sup>. Many species use surface-specific motility systems  
42 such as twitching, gliding, and swarming to migrate on solid substrates<sup>2</sup>. However,  
43 we still know very little about how cells regulate and control surface motility. In  
44 particular, the role of mechanical signals in regulating the motility of single cells  
45 remains vastly underexplored in bacteria, as well as in higher order  
46 microorganisms<sup>3</sup>.

47 To migrate towards nutrients and light or away from predators and toxins, cells  
48 actively steer motility in response to environmental signals. For example,  
49 chemotactic systems mediate motility towards specific molecular ligands<sup>4,5</sup>. Bacteria  
50 have a remarkably diverse set of chemotaxis systems. The canonical Che system,  
51 which has been extensively studied as a regulator of *Escherichia coli* swimming, is  
52 widely conserved among motile species including non-swimming ones<sup>6</sup>. However,  
53 the signal inputs and the motility outputs of bacterial chemotaxis-like systems remain  
54 unidentified in many species<sup>7</sup>.

55 *Pseudomonas aeruginosa* is a major opportunistic pathogen well-adapted to  
56 growth on surfaces. *P. aeruginosa* colonizes and explores abiotic and host surfaces  
57 using twitching motility, which is powered by retractile extracellular filaments called  
58 type IV pili (T4P)<sup>8</sup>. During twitching, single cells pull themselves by successive  
59 rounds of T4P extension, attachment and retraction<sup>8,9</sup>. T4P extend and retract from  
60 the cell surface by respective polymerization and depolymerization of the pilin  
61 subunit PilA at the poles<sup>8,9</sup>. While an understanding of the assembly mechanisms of  
62 individual filaments is beginning to emerge, we still don't know whether and how  
63 cells coordinate multiple T4P at their surface to power migration over large  
64 distances.

65 Several chemical compounds bias collective or single cell twitching migration<sup>10-12</sup>.  
66 It however remains unclear whether they passively bias twitching displacements or  
67 actively guide motility. Genetic studies suggest that a chemotaxis-like system called  
68 Chp regulates twitching<sup>13</sup>. Beyond playing a role in the transcription of T4P genes,  
69 the mechanism by which Chp regulates motility remains unknown<sup>14,15</sup>. In addition,  
70 unlike homologs from the well-studied canonical *E. coli* Che system, the Chp methyl

71 accepting chemotaxis protein called PilJ has no clear chemical ligand<sup>15,16</sup>. Also  
72 unlike Che which possesses a single response regulator, the Chp system possesses  
73 two response regulators, PilG and PilH, whose respective functions remain  
74 unresolved<sup>16</sup>.

75 We previously demonstrated that *P. aeruginosa* upregulates genes coding for  
76 virulence factors upon surface contact in a T4P- and Chp-dependent manner<sup>17,14</sup>.  
77 There is however no clear evidence that Chp controls any other cellular process than  
78 transcription, which is unexpected for a chemotaxis system<sup>13,15,18</sup>. The homology  
79 between Chp and Che systems suggests a tactic function for Chp. As a result, we  
80 rigorously tested the hypothesis that Chp regulates twitching motility of single cells in  
81 response to T4P mechanical input at the timescale of seconds.

82

### 83 **Main**

84 The canonical Che system regulates bacterial swimming by transducing an input  
85 chemical signal into a motility response via flagellar rotation control<sup>19</sup>. By analogy,  
86 we hypothesized that the chemotaxis-like Chp system regulates the trajectory of  
87 single twitching cells<sup>15</sup>. Chp mutants twitch aberrantly in the traditional stab assay  
88 (Extended Data Fig. 1ab)<sup>14,18</sup>. These mutants also have altered cyclic AMP (cAMP)  
89 levels (Extended Data Fig. 1c)<sup>17</sup>. cAMP regulates the transcription of virulence genes  
90 upon surface contact, so that Chp mutants have aberrant T4P numbers (Extended  
91 Data Fig. 1d)<sup>17</sup>. To overcome a potential cross-talk, we decoupled the Chp-  
92 dependent, short timescale motility control from cAMP-dependent transcription by  
93 investigating single cell twitching in constitutively low or high cAMP regimes.

94 We first explored the functions of Chp in directing twitching motility by visualizing  
95 individual isolated motile WT (Fig. 1a, Supplementary Video 1), *cpdA*<sup>-</sup>, *pilH*<sup>-</sup>, and  
96 *pilG*<sup>-</sup> *cpdA*<sup>-</sup> cells, all of which have elevated cAMP levels (Extended Data Fig.1c), at  
97 the interface between a glass coverslip and an agarose pad. In all strains, we  
98 computed the linear displacements of single cells to visually highlight the balance  
99 between persistent forward motion and reversals for single cells (Fig. 1b). We also  
100 computed their mean reversal frequency (Fig. 1c). WT and *cpdA*<sup>-</sup> cells mostly move  
101 persistently forward and only occasionally reversed twitching direction (Fig. 1bc).  
102 *pilG*<sup>-</sup> *cpdA*<sup>-</sup> cells reversed so frequently that they appeared to “jiggle”, never really  
103 persisting in a single direction of twitching (Supplementary Video 2, Fig. 1bc). They  
104 ultimately had very little net migration, consistent with their reduced twitching motility

105 in the stab assay (Extended Data Fig. 1a). By contrast, *pilH* moved very persistently  
106 in a single direction and reversed very rarely (Fig. 1bc). Likewise, *pilH cyaB*<sup>-</sup> with  
107 reduced cAMP levels compared to *pilH* had near zero reversal frequency, confirming  
108 the Chp-dependent, cAMP-independent control of twitching direction (Fig. 1c).

109 Upon colliding other cells, WT cells often reversed their twitching direction (Fig.  
110 1d, Supplementary Video 3). *pilG*<sup>-</sup> *cpdA*<sup>-</sup> reversed almost always after collision,  
111 whereas *pilH* almost never did (Fig. 1ce, Supplementary Video 3 and 4). Because  
112 *pilH* cells were unable to reverse, they gradually formed groups by jamming, while  
113 WT *P. aeruginosa* were able to spread more evenly (Fig. 1f and Supplementary  
114 Video 4). Therefore, Chp provides single *P. aeruginosa* cells with the ability to  
115 migrate persistently in one direction and to rapidly change twitching direction. PilG  
116 promotes persistent forward motility, driving migration over long distances. PilH  
117 enables directional changes particularly useful upon collisions with other bacteria. By  
118 controlling reversal rates upon collision, Chp-dependent mechanosensing can  
119 enhance the motility of *P. aeruginosa* groups, evoking the control of collective motile  
120 behavior in the bacterium *Myxococcus xanthus*<sup>20,21</sup>.

121 To investigate how PilG and PilH control twitching direction, we focused on the  
122 distribution of T4P between the two poles of a cell. We imaged *P. aeruginosa* by  
123 interferometric scattering microscopy (iSCAT) to quantify T4P at each cell pole and  
124 evaluate their distributions. We found that WT and *cpdA*<sup>-</sup> had T4P distributions close  
125 to a random distribution (Extended Data Fig. 2). In contrast, T4P of *pilG*<sup>-</sup> *cpdA*<sup>-</sup> were  
126 distributed more symmetrically compared to the random distribution and to WT.  
127 While *pilH* had too many T4P for a direct comparison with other mutants, we could  
128 quantify distributions in the less piliated *pilH cyaB*<sup>-</sup> background (Extended Data Fig.  
129 1d). The T4P distribution of *pilH cyaB*<sup>-</sup> was markedly more asymmetric than the  
130 random distribution (Extended Data Fig. 2), consistent with its inability to reverse  
131 twitching direction. We conclude that the Chp system polarizes T4P to regulate  
132 twitching direction. PilG promotes unipolar T4P deployment driving persistent  
133 forward migration, while PilH promotes T4P deployment at both poles  
134 simultaneously, favoring reversals.

135

136 T4P extend and retract from the cell surface by respective polymerization and  
137 depolymerization of the pilin subunit PilA at the poles. The extension motor PilB  
138 assembles PilA monomers to extend T4P, while the retraction motors PilT and PilU

139 disassemble filaments to generate traction forces<sup>8,9</sup>. We reasoned that, for the Chp  
140 system to regulate T4P polarization and sets a cell's twitching direction, it must  
141 control either extension or retraction at a given pole. To test this hypothesis, we  
142 investigated how the localization of extension and retraction motors regulate the  
143 deployment of T4P to direct twitching. First, we simultaneously visualized T4P  
144 distribution and motor protein subcellular localization within single cells. To this end,  
145 we generated chromosomal mNeonGreen (mNG) fluorescent protein fusions to the  
146 extension motor PilB, to its regulator FimX<sup>22</sup>, and to the retraction motors PilT and  
147 PilU at their native loci (Fig. 2a). All fusion proteins primarily exhibited bright  
148 fluorescent foci at one or both poles consistent with inducible plasmid-borne  
149 fusions<sup>23,24</sup>. We leveraged correlative iSCAT-fluorescence microscopy for  
150 simultaneous imaging of extracellular filaments and fluorescent reporter fusions (Fig.  
151 2b)<sup>25</sup>. In single cells, we identified the pole with brightest fluorescent signal and the  
152 pole with most T4P. We then categorized cells into two groups: cells with more T4P  
153 at the bright pole, and cells with less T4P at the bright pole. We found that in more  
154 than 60% of cells, the poles with more T4P had the brightest PilB-mNG fluorescent  
155 signal (Fig. 2c)<sup>23</sup>. On the other hand, we found no negative correlation between  
156 mNG-PilT or mNG-PilU signals and relative numbers of T4P, which would be  
157 expected if cells controlled T4P distribution using retraction. As a result, we found  
158 that PilB, but neither PilT nor PilU, control the polarized deployment of T4P.

159 To test whether the control of T4P polarization by PilB ultimately determined  
160 *P. aeruginosa* twitching direction, we investigated the dynamic localization motors in  
161 single twitching cells (Extended Data Fig. 3, Supplementary Video 5). While mNG-  
162 PilT and mNG-PilU fusions were fully functional, PilB-mNG exhibited a partial  
163 twitching motility defect (Extended Data Fig. 4a). We therefore systematically  
164 validated PilB localization results by visualization of its regulator FimX using mNG-  
165 FimX, which was fully functional (Extended Data Fig. 4). We tracked single cells  
166 while measuring the subcellular localization of the fusion proteins. We first  
167 categorized cells as moving and non-moving. We then measured the proportion of  
168 cells that had asymmetric and symmetric protein localizations based on a threshold  
169 of fluorescence ratio between poles. We found that PilB-mNG and mNG-FimX  
170 localizations were more asymmetric (*i.e.* polarized) in moving cells compared to non-  
171 moving cells (Fig. 2d). In addition, both fusion proteins changed localization and  
172 polarity during reversals (Extended Data Fig. 5, Supplementary Video 6)<sup>22</sup>. In

173 contrast, the localization of mNG-PilT and mNG-PilU was largely symmetric across  
174 the population, without marked symmetry differences between non-moving and  
175 moving cells. Since PilB and FimX polarize in moving cells, we computed the  
176 correlation between the twitching direction and fusion protein polarization (*i.e.* the  
177 localization of their brightest polar spot). We found that more than 90% of cells  
178 moved in the direction of the bright PilB and FimX pole (Fig. 2e). Altogether, our data  
179 shows that polarized extension and constitutive retraction controls *P. aeruginosa*  
180 twitching direction.

181 T4P mediate a Chp- and cAMP-dependent transcriptional response to surface  
182 contact<sup>17</sup>. As a result, we tested whether T4P activity itself regulates PilB  
183 polarization. We reasoned that the longer a cell resides on a surface, the more likely  
184 it is to experience mechanical stimuli from T4P. We thus compared polarization of  
185 cell populations right after contact (10 min) with populations that were associated  
186 with the surface for longer times (60 min). We focused on the dynamic localization of  
187 mNG-FimX. First, we found that in many cells, polar mNG-FimX foci relocated from  
188 pole to pole within a short timeframe after surface contact, as if they were oscillating  
189 (Fig. 3a, Supplementary Video 7). These were reminiscent of oscillations in the  
190 twitching and gliding regulators observed in *M. xanthus*<sup>21,26,27</sup>. The proportion of cells  
191 exhibiting these oscillations became smaller after prolonged surface contact (Fig. 3b,  
192 Extended Data Fig. 6a), suggesting that surface sensing inhibits mNG-FimX  
193 oscillations and stabilizes polarization. To test whether mechanosensing with T4P  
194 induces polarization of the extension machinery, we visualized mNG-FimX in a *pilA*<sup>-</sup>  
195 mutant background, which also displayed oscillations (Fig. 3c, Supplementary Video  
196 8). We found that the fractions of *pilA*<sup>-</sup> cells that showed mNG-FimX oscillations 10  
197 and 60 min after surface contact were equal, near 90% (Fig. 3d). The distributions of  
198 oscillation frequencies between these two states were also indistinguishable  
199 (Extended Data Fig. 6b). Altogether, our results demonstrate that T4P-mediated  
200 mechanosensing at one pole locally recruits and stabilizes extension motors, thereby  
201 inducing a positive feedback onto their own activity. While several exogenous  
202 molecular compounds bias collective or single cell twitching migration<sup>10-12</sup>, our data  
203 shows chemical gradients are not necessary for active regulation of twitching.

204  
205 PilB polarization sets the twitching direction of single cells, and PilG and PilH  
206 regulate T4P polarization to control reversals. We therefore investigated how the



207 Chp system regulates PilB localization to control a cell's direction of motion. We  
208 compared the mean localization profiles of PilB-mNG and mNG-FimX in WT, *pilG*<sup>-</sup>  
209 and *pilH*<sup>-</sup> backgrounds (Fig. 4a, b, Extended Data Fig. 7a). Both fusion proteins had  
210 greater polar fluorescent signal in *pilH*<sup>-</sup> and lower polar signal in *pilG*<sup>-</sup> compared to  
211 WT (Fig. 4c, d). We computed a polar localization index which measures the  
212 proportion of the signal localized at the poles relative to the total fluorescence  
213 (Extended Data Fig. 7b). About 50% of the mNG-FimX and PilB-mNG signal is found  
214 at the poles for WT, 70% of the signal is polar in *pilH*<sup>-</sup>, and most of it is diffuse in *pilG*<sup>-</sup>  
215 (Fig. 4e, g). We next computed a symmetry index that quantifies the extent of signal  
216 polarization, that is how bright a pole is compared to the other, a value of 0.5 being  
217 completely symmetric (Extended Data Fig. 7b). WT cells grown in liquid had a mNG-  
218 FimX and PilB-mNG symmetry index of about 0.6 (Fig. 4f, h). In contrast, *pilH*<sup>-</sup> cells  
219 were more polarized, with a symmetry index close to 0.75. Compared to WT, mNG-  
220 FimX was more symmetric in a *pilG*<sup>-</sup> background (Fig. 4h). We verified that the  
221 increase in expression levels in the different Chp mutants did not exacerbate PilB  
222 and FimX localization and polarization (Extended Data Fig. 8). In summary, we  
223 showed that PilG promotes polar recruitment and polarization of PilB and its  
224 regulator FimX, which is counteracted by PilH.

225 We then wondered how *P. aeruginosa* orchestrates two response regulators with  
226 opposing functions. Yeast and amoebae control cell polarization in response to  
227 environmental cues using spatially structured positive and negative feedback<sup>28</sup>. By  
228 analogy, we considered a model wherein PilG and PilH segregate to implement  
229 positive and negative feedback at distinct subcellular locations<sup>29</sup>. We therefore  
230 investigated the localization of functional mNG-PilG and mNG-PilH integrated at their  
231 native chromosomal loci (Fig. 5a). We found that PilG predominantly localizes to the  
232 poles (Fig. 5b, c). PilH is mainly diffuse in the cytoplasm, with only a small fraction at  
233 the poles (Fig. 5b, c). *P. aeruginosa* can therefore implement the antagonistic  
234 functions of PilG and PilH by localizing the former to the poles and the latter to the  
235 cytoplasm.

236 We next analyzed the relationship between a cell's direction of migration with  
237 mNG-PilG and mNG-PilH polarization (Extended Data Fig. 9a, Supplementary Video  
238 9). We found that 90% of cells moved towards their bright mNG-PilG pole, while only  
239 50% did in mNG-PilH, corresponding to a random orientation relative to the direction  
240 of migration (Fig. 5d). By comparing the asymmetry of polar foci, we found that



241 mNG-PilG signal was largely asymmetric in motile cells compared to the non-motile  
242 population (Fig. 5e). Consistent with this, in cells that reversed twitching direction,  
243 mNG-PilG localization switched to the new leading pole prior to reversal (Fig. 5f,  
244 Extended Data Fig. 9b, Supplementary Video 10). We found that the polar signal of  
245 mNG-PilH was mainly symmetric, both in moving and non-moving subpopulations  
246 (Fig. 5d). Thus, PilG, but not PilH, actively localizes to the leading pole during  
247 twitching, recapitulating the dynamic polarization of PilB and FimX. Therefore, T4P  
248 input at the leading pole activates PilG. Polar PilG drive a local positive feedback on  
249 T4P extension to maintain the direction of twitching. Cytoplasmic PilH stimulate  
250 reversals by inhibiting PilB polarization, permitting reassembly at the opposite pole.  
251 In summary, *P. aeruginosa* controls mechanotactic twitching using a local-excitation,  
252 global-inhibition signaling network architecture akin to chemotactic signaling in  
253 amoebae and neutrophils (Extended Data Fig. 10)<sup>5,30</sup>.

254

## 255 **Discussion**

256 We discovered that *P. aeruginosa* controls the direction of twitching motility in  
257 response to mechanical signals from the motility machinery itself. This migration  
258 strategy differs from the one employed in chemotactic control of swimming motility.  
259 Chemotaxis systems control the rate at which swimming cells switch the direction of  
260 rotation of their flagella, generating successive run-and-tumbles<sup>4,19</sup> or flicks<sup>31</sup> that  
261 cause directional changes. However, T4P must disassemble from one pole and  
262 reassemble at the opposite in order to reverse cell movement. In essence, this tactic  
263 strategy is akin to the one of single eukaryotic cells such as amoebae and  
264 neutrophils that locally remodel their cytoskeleton to attach membrane protrusions in  
265 the direction of a stimulus<sup>5</sup>.

266 Ultimately, the ability to balance persistent forward migration with reversals  
267 optimizes *P. aeruginosa* individual twitching. Reversal may occur spontaneously or  
268 upon perturbations, for example when colliding another cell. The Chp system may  
269 also promote asymmetric piliation of upright twitching *P. aeruginosa* cells during  
270 exploratory motility<sup>32</sup>. We also found that the ability to reverse upon collision  
271 prevents jamming of groups of cells, supporting a model wherein the Chp system  
272 orchestrates collective migration<sup>15</sup>. More generally, we anticipate that other bacteria,  
273 as well as archaeal and eukaryotic species that actively migrate on surfaces

274 leverage mechanosensation to control reversal rates and orchestrate collective  
275 motility behaviors<sup>27</sup>.

276 Beyond bacteria, eukaryotic cells also have the ability to transduce mechanical  
277 signals into cellular responses, regulating an array of physiological processes  
278 including development, immunity and touch sensation<sup>33</sup>. Eukaryotic cell motility is  
279 also sensitive to mechanical cues. For example, adherent mammalian cells migrate  
280 up gradients of substrate material stiffness in a process termed durotaxis<sup>34</sup>. We  
281 established that single cells can actively sense their mechanical environment to  
282 control motility on the timescale of seconds. Our work thus expands our view of  
283 signals activating bacterial sensing systems and more generally highlights the role of  
284 mechanics in regulating motility, be it in bacteria, archaea or eukaryotes<sup>35</sup>.

285 Altogether, the Chp system functions as a spatial sensor for mechanical input.  
286 Thus, chemotaxis-like systems can sense spatially-resolved mechanical signals, a  
287 feat that is still debated when only considering diffusible molecules as input stimuli<sup>36</sup>.  
288 Phototactic systems may however be an exception by conferring cyanobacteria the  
289 ability to spatially sense gradients of light<sup>37,38</sup>. Accordingly, the Pix phototactic  
290 system of the cyanobacterium *Synechocystis* shares signal transduction architecture  
291 with the *P. aeruginosa* Chp system by harboring two CheY-like response regulators,  
292 PixG and PixH<sup>37,38</sup>. There also exists a broad range of chemotaxis-like systems with  
293 even higher degrees of architectural complexity<sup>39</sup>. We thus highlight that their  
294 subcellular arrangement may play important functions in the mechanism by which  
295 they regulate motility.

296 Finally, we revealed an unexpected commonality between bacteria, and single  
297 eukaryotic cells in the way they transduce environmental signals to control polarity<sup>5</sup>.  
298 Amoebae and neutrophils have evolved a complex circuitry which combines positive  
299 and negative feedback loops to chemotax<sup>28</sup>. Positive regulators activate actin  
300 polymerization locally to drive membrane protrusion in the direction of polarization.  
301 Negative regulators inhibit actin polymerization throughout the cytoplasm to limit  
302 directional changes while also permitting adaptation<sup>28</sup>. Altogether, these cells  
303 establish a local activation-global inhibition landscape that balances directional  
304 persistence with adaptation<sup>30</sup>. By virtue of PilG and PilH compartmentalization,  
305 *P. aeruginosa* replicates the local activation-global inhibition landscape<sup>30</sup>. We have  
306 therefore uncovered a signal transduction architecture permitting mechanotaxis in

307 response to spatially-resolved signals that is evolutionarily conserved across  
308 kingdoms of life.  
309

310 **References**

- 311
- 312 1. Costerton, J. W., Lewandowski, Z., Caldwell, D. E., Korber, D. R. & Lappin-Scott, H. M.
- 313 Microbial biofilms. *Annu. Rev. Microbiol.* **49**, 711–745 (1995).
- 314 2. Jarrell, K. F. & McBride, M. J. The surprisingly diverse ways that prokaryotes move.
- 315 *Nature Reviews Microbiology* **6**, 466–476 (2008).
- 316 3. Dufrêne, Y. F. & Persat, A. Mechanomicrobiology: how bacteria sense and respond to
- 317 forces. *Nature Reviews Microbiology* **18**, 227–240 (2020).
- 318 4. Bi, S. & Sourjik, V. Stimulus sensing and signal processing in bacterial chemotaxis.
- 319 *Current Opinion in Microbiology* **45**, 22–29 (2018).
- 320 5. Van Haastert, P. J. M. & Devreotes, P. N. Chemotaxis: signalling the way forward.
- 321 *Nature Reviews Molecular Cell Biology* **5**, 626–634 (2004).
- 322 6. Stock, A. M., Robinson, V. L. & Goudreau, P. N. Two-Component Signal Transduction.
- 323 *Annual Review of Biochemistry* **69**, 183–215 (2000).
- 324 7. Matilla, M. A. & Krell, T. The effect of bacterial chemotaxis on host infection and
- 325 pathogenicity. *FEMS Microbiology Reviews* **42**, (2018).
- 326 8. Burrows, L. L. *Pseudomonas aeruginosa* Twitching Motility: Type IV Pili in Action.
- 327 *Annual Review of Microbiology* **66**, 493–520 (2012).
- 328 9. Merz, A. J., So, M. & Sheetz, M. P. Pilus retraction powers bacterial twitching motility.
- 329 *Nature* **407**, 98–102 (2000).
- 330 10. Kearns, D. B., Robinson, J. & Shimkets, L. J. *Pseudomonas aeruginosa* Exhibits
- 331 Directed Twitching Motility Up Phosphatidylethanolamine Gradients. *Journal of*
- 332 *Bacteriology* **183**, 763–767 (2001).
- 333 11. Limoli, D. H. *et al.* Interspecies interactions induce exploratory motility in *Pseudomonas*
- 334 *aeruginosa*. *eLife* **8**, e47365 (2019).
- 335 12. Oliveira, N. M., Foster, K. R. & Durham, W. M. Single-cell twitching chemotaxis in
- 336 developing biofilms. *Proceedings of the National Academy of Sciences* **113**, 6532–6537
- 337 (2016).

- 338 13. Bertrand, J. J., West, J. T. & Engel, J. N. Genetic Analysis of the Regulation of Type IV  
339 Pilus Function by the Chp Chemosensory System of *Pseudomonas aeruginosa*. *Journal*  
340 *of Bacteriology* **192**, 994–1010 (2010).
- 341 14. Fulcher, N. B., Holliday, P. M., Klem, E., Cann, M. J. & Wolfgang, M. C. The  
342 *Pseudomonas aeruginosa* Chp chemosensory system regulates intracellular cAMP  
343 levels by modulating adenylate cyclase activity. *Molecular Microbiology* **76**, 889–904  
344 (2010).
- 345 15. Whitchurch, C. B. *et al.* Characterization of a complex chemosensory signal transduction  
346 system which controls twitching motility in *Pseudomonas aeruginosa*. *Molecular*  
347 *Microbiology* **52**, 873–893 (2004).
- 348 16. Darzins, A. Characterization of a *Pseudomonas aeruginosa* gene cluster involved in  
349 pilus biosynthesis and twitching motility: sequence similarity to the chemotaxis proteins  
350 of enterics and the gliding bacterium *Myxococcus xanthus*. *Molecular Microbiology* **11**,  
351 137–153 (1994).
- 352 17. Persat, A., Inclan, Y. F., Engel, J. N., Stone, H. A. & Gitai, Z. Type IV pili  
353 mechanochemically regulate virulence factors in *Pseudomonas aeruginosa*.  
354 *Proceedings of the National Academy of Sciences of the United States of America* **112**,  
355 7563–7568 (2015).
- 356 18. Buensuceso, R. N. C. *et al.* Cyclic AMP-Independent Control of Twitching Motility in  
357 *Pseudomonas aeruginosa*. *Journal of Bacteriology* **199**, (2017).
- 358 19. Berg, H. C. *E. coli in Motion*. (Springer New York, 2004). doi:10.1007/b97370.
- 359 20. Thutupalli, S., Sun, M., Bunyak, F., Palaniappan, K. & Shaevitz, J. W. Directional  
360 reversals enable *Myxococcus xanthus* cells to produce collective one-dimensional  
361 streams during fruiting-body formation. *Journal of The Royal Society Interface* **12**,  
362 20150049 (2015).
- 363 21. Blackhart, B. D. & Zusman, D. R. ‘Frizzy’ genes of *Myxococcus xanthus* are involved in  
364 control of frequency of reversal of gliding motility. *PNAS* **82**, 8767–8770 (1985).

- 365 22. Jain, R. *et al.* Interaction of the cyclic-di-GMP binding protein FimX and the Type 4 pilus  
366 assembly ATPase promotes pilus assembly. *PLOS Pathogens* **13**, e1006594 (2017).
- 367 23. Chiang, P., Habash, M. & Burrows, L. L. Disparate Subcellular Localization Patterns of  
368 *Pseudomonas aeruginosa* Type IV Pilus ATPases Involved in Twitching Motility. *Journal*  
369 *of Bacteriology* **187**, 829–839 (2005).
- 370 24. Kazmierczak, B. I., Lebron, M. B. & Murray, T. S. Analysis of FimX, a phosphodiesterase  
371 that governs twitching motility in *Pseudomonas aeruginosa*. *Molecular Microbiology* **60**,  
372 1026–1043 (2006).
- 373 25. Ortega Arroyo, J., Cole, D. & Kukura, P. Interferometric scattering microscopy and its  
374 combination with single-molecule fluorescence imaging. *Nature Protocols* **11**, 617–633  
375 (2016).
- 376 26. Galicia, C. *et al.* MglA functions as a three-state GTPase to control movement reversals  
377 of *Myxococcus xanthus*. *Nature Communications* **10**, 5300 (2019).
- 378 27. Guzzo, M. *et al.* A gated relaxation oscillator mediated by FrzX controls morphogenetic  
379 movements in *Myxococcus xanthus*. *Nature Microbiology* **3**, 948–959 (2018).
- 380 28. Brandman, O. & Meyer, T. Feedback Loops Shape Cellular Signals in Space and Time.  
381 *Science* **322**, 390–395 (2008).
- 382 29. Inclan, Y. F. *et al.* A scaffold protein connects type IV pili with the Chp chemosensory  
383 system to mediate activation of virulence signaling in *Pseudomonas aeruginosa*.  
384 *Molecular Microbiology* **101**, 590–605 (2016).
- 385 30. Levchenko, A. & Iglesias, P. A. Models of Eukaryotic Gradient Sensing: Application to  
386 Chemotaxis of Amoebae and Neutrophils. *Biophysical Journal* **82**, 50–63 (2002).
- 387 31. Son, K., Guasto, J. S. & Stocker, R. Bacteria can exploit a flagellar buckling instability to  
388 change direction. *Nature Physics* **9**, 494–498 (2013).
- 389 32. Gibiansky, M. L. *et al.* Bacteria Use Type IV Pili to Walk Upright and Detach from  
390 Surfaces. *Science* **330**, 197–197 (2010).
- 391 33. Kefauver, J. M., Ward, A. B. & Patapoutian, A. Discoveries in structure and physiology of  
392 mechanically activated ion channels. *Nature* **587**, 567–576 (2020).

- 393 34. Sunyer, R. *et al.* Collective cell durotaxis emerges from long-range intercellular force  
394 transmission. *Science* **353**, 1157–1161 (2016).
- 395 35. Houk, A. R. *et al.* Membrane Tension Maintains Cell Polarity by Confining Signals to the  
396 Leading Edge during Neutrophil Migration. *Cell* **148**, 175–188 (2012).
- 397 36. Berg, H. C. & Purcell, E. M. Physics of chemoreception. *Biophysical Journal* **20**, 193–  
398 219 (1977).
- 399 37. Schuergers, N. *et al.* Cyanobacteria use micro-optics to sense light direction. *eLife* **5**, 1–  
400 16 (2016).
- 401 38. Schuergers, N., Mullineaux, C. W. & Wilde, A. Cyanobacteria in motion. *Curr Opin Plant*  
402 *Biol* **37**, 109–115 (2017).
- 403 39. Porter, S. L., Wadhams, G. H. & Armitage, J. P. Signal processing in complex  
404 chemotaxis pathways. *Nature Reviews Microbiology* **9**, 153–165 (2011).
- 405



406 **Acknowledgments**

407 LT, ZAM, IV, XP, AP are supported by the SNSF Projects grant number  
408 310030\_189084. MJK is supported by the EMBO postdoctoral fellowship ALTF 495-  
409 2020. JNE, YI, RP, HM and are supported by an NIH R01 grant number AI129547  
410 and by the Cystic Fibrosis Foundation (495008).

411 **Author contributions**

412 MJK, LT, JNE and AP conceived and supervised the project. MJK, LT, YI, HM, RP,  
413 ZAM conducted the experiments. MJK, LT, IV, JN wrote the tracking code and  
414 analyzed the data. MJK, LT, JNE and AP wrote the manuscript.

415 **Competing interests**

416 Authors declare no competing interests.

417 **Correspondance**

418 Alexandre Persat ([alexandre.persat@epfl.ch](mailto:alexandre.persat@epfl.ch))

419 Joanne Engel ([joanne.engel@ucsf.edu](mailto:joanne.engel@ucsf.edu))

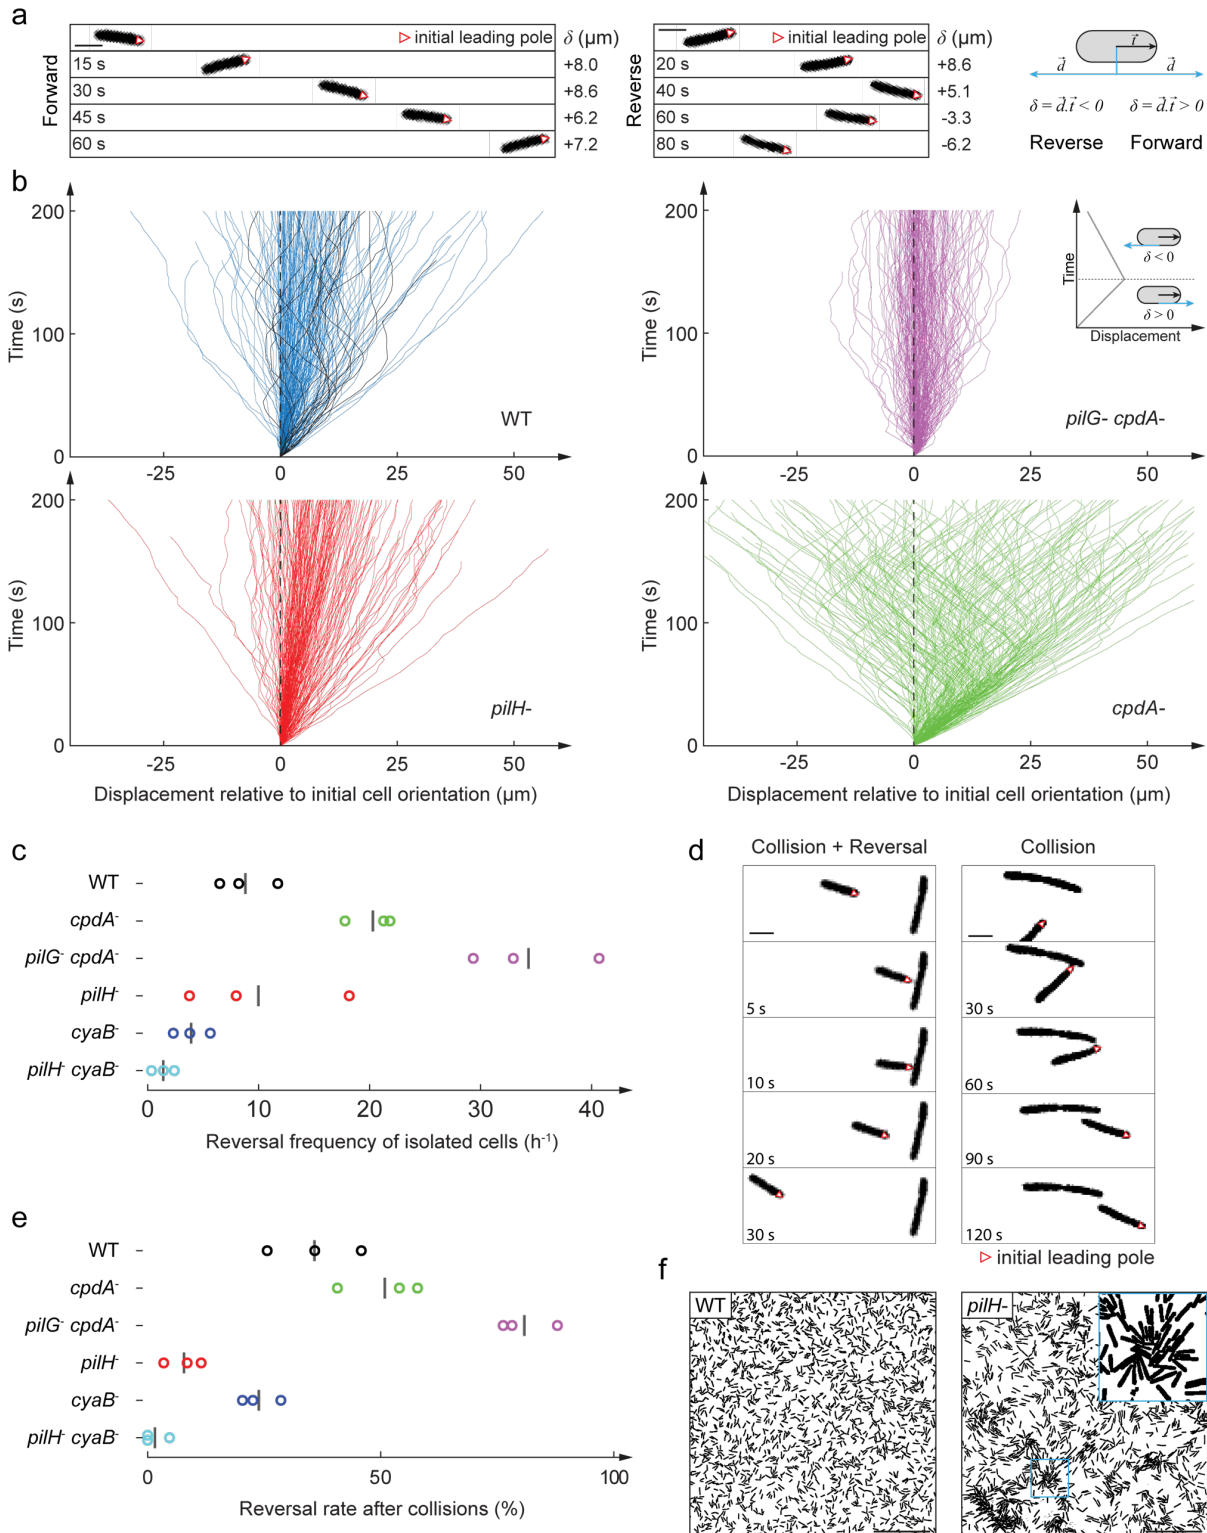

**Figure 1. The Chp system regulates the twitching trajectories of individual *P. aeruginosa* cells.** (a) Phase contrast snapshots of forward and reverse migration.  $\vec{t}$  is a unit vector oriented along the cell body in the initial direction of motion.  $\vec{d}$  is the unit displacement vector.  $\delta$  is the dot product  $\vec{d} \cdot \vec{t}$ , which quantifies displacements relative to the initial direction of motility. Scale bar, 2  $\mu\text{m}$ . (b) Graphs of cumulative

420

421

422

423

424

425

426 net displacement as a function of time, highlighting the forward and reverse twitching  
427 behavior of Chp mutants. Each curve corresponds to an individual cell trajectory.  
428 Tracks of reversing WT cells are highlighted in black. At any given time, a curve  
429 oriented toward the top right corresponds to a cell moving forward, while a curve  
430 oriented toward top left corresponds to reverse movement (*cf.* inset). *pilG<sup>-</sup> cpdA<sup>-</sup>*  
431 constantly reverses twitching direction while *pilH<sup>+</sup>* cells persistently move forward. **(c)**  
432 Quantification of reversal rates in Chp and cAMP mutants. *pilG<sup>-</sup> cpdA<sup>-</sup>* has highest  
433 reversal frequency. *pilH<sup>+</sup>* has a two-fold lower reversal frequency than *cpdA<sup>-</sup>*. Circles  
434 correspond to biological replicates, black bars represent their mean. **(d)** Snapshots  
435 of WT reversing upon collision with another cell (left). The same sequence for a *pilH<sup>+</sup>*  
436 cell, failing to reverse upon collision (right). Scale bar, 2  $\mu\text{m}$ . **(e)** Fraction of cells  
437 reversing upon collision with another cell. About half of WT cells reverse after  
438 collision, *pilH<sup>+</sup>* almost never reserves after collision, and *pilG<sup>-</sup> cpdA<sup>-</sup>* almost always  
439 reverses. Circles correspond to biological replicates, black bars represent their  
440 mean. **(F)** While WT is able to move efficiently at high density, the reduced ability of  
441 *pilH<sup>+</sup>* to reverse upon collision leads to cell jamming and clustering. Scale bar, 50  $\mu\text{m}$ .  
442 Background strain: PAO1 *fliC<sup>-</sup>*.

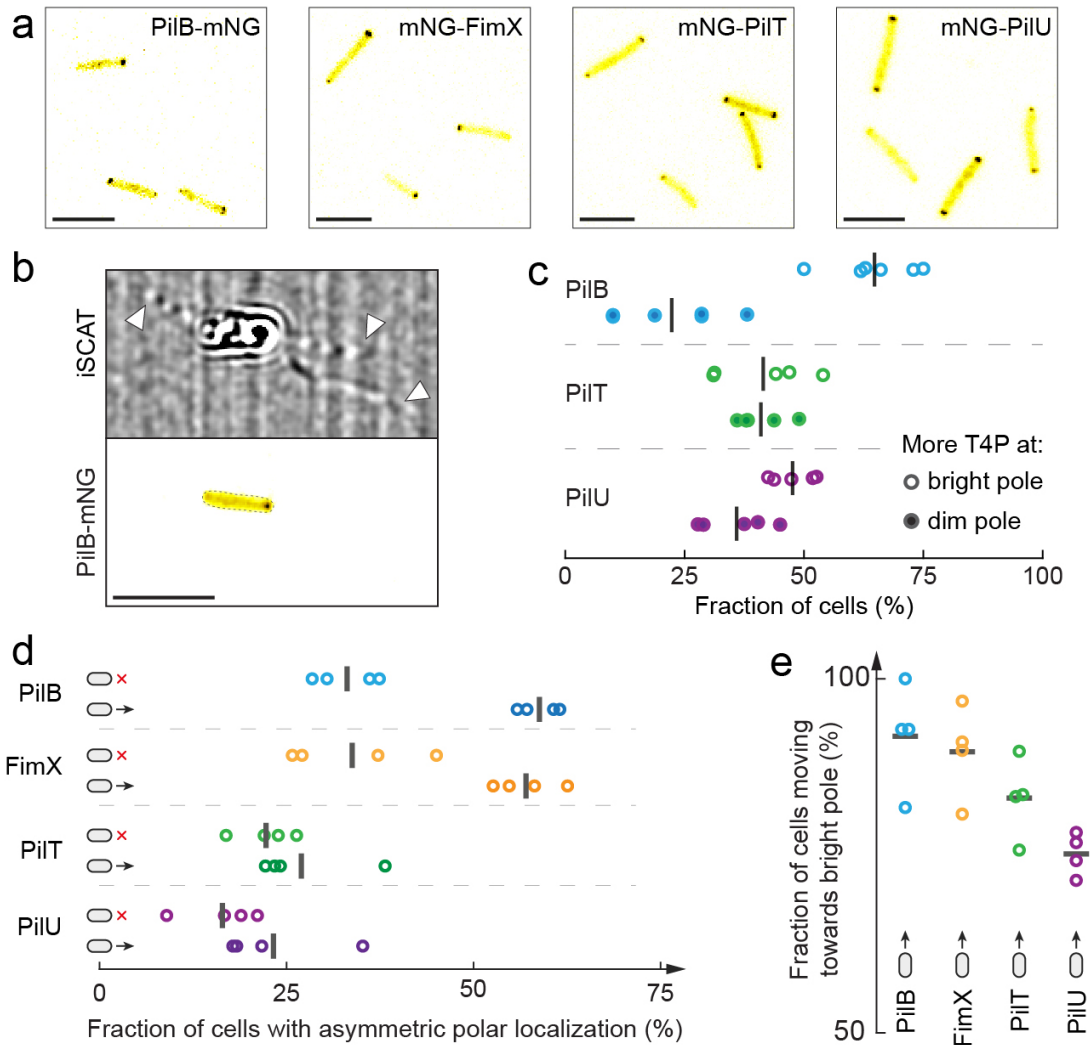

443  
444  
445  
446  
447  
448  
449  
450  
451  
452  
453  
454  
455  
456  
457  
458

**Figure 2. The localization of the extension motor PilB sets the direction of**

**twitching and the polarization of T4P activity.** (a) Snapshot of chromosomal

fluorescent protein fusions to the extension motor PilB, its regulator FimX, and the

retraction motors PilT and PilU. Scale bars, 5  $\mu$ m. (b) Simultaneous imaging of PilB-

mNG and T4P by correlative iSCAT fluorescence. White arrowheads indicate T4P.

Scale bar, 5  $\mu$ m. (c) Fraction of cells with more T4P at bright vs dim fluorescent pole.

Most cells have more T4P at the bright PilB-mNG pole. We could not distinguish a

T4P depletion at the bright retraction motor poles. Each circle is the mean fraction for

one biological replicate. Black bars correspond to their mean across replicates. (d)

Comparison of the symmetry of polar fluorescence between moving and non-moving

cells. PilB and FimX signal is more asymmetric in moving cells, which is not the case

for PilT and PilU. (e) Fraction of cell twitching in the direction of their brightest pole.

Circles correspond the fraction of each biological replicate, black bars represent their

mean.

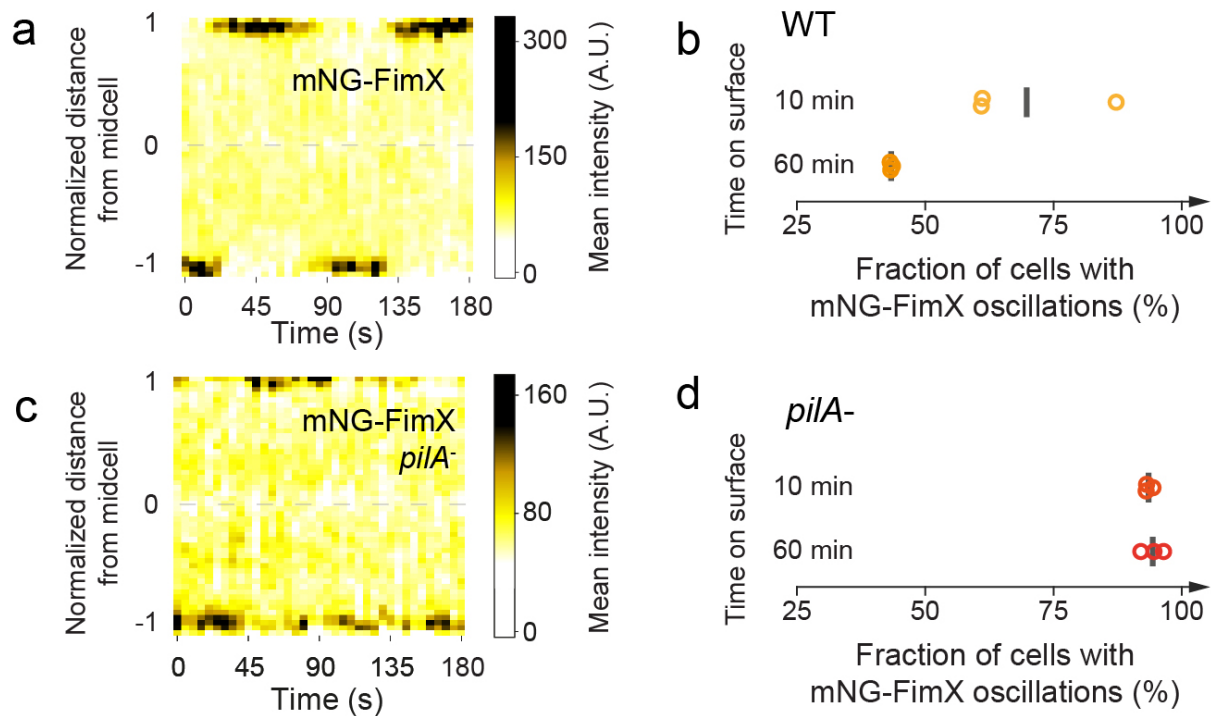

459

460

461

**Figure 3. Mechanical input signal from T4P controls the polarization of FimX,**

**the activator of the extension motor PilB. (a) Kymograph of mNG-FimX**

fluorescence in a non-moving cell 10 min after surface contact. The bright

fluorescent focus sequentially disappears from one pole to appear at the opposite to

establish oscillations. (b) Fraction of cells that showed pole to pole oscillations in WT

and *pilA*<sup>-</sup>. The proportion of oscillating WT reduces as they remain on the surface,

conversely increasing the proportion of stably polarized cells. (c) Kymograph of

mNG-FimX fluorescence in a *pilA*<sup>-</sup> background 60 min after surface contact. Scale

bar, 5  $\mu$ m. (d) Most *pilA*<sup>-</sup> cells maintain oscillatory fluctuations in mNG-FimX polar

localization.

469

470

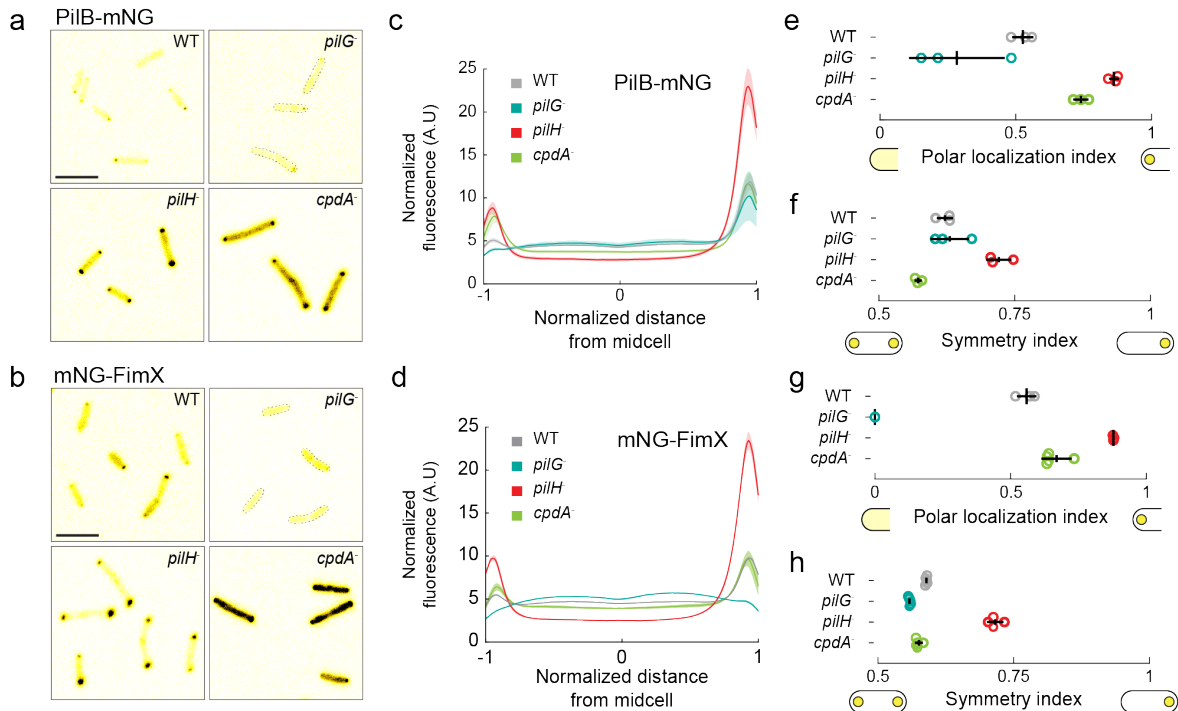

471

472

**Figure 4. PilG and PilH control the polarization T4P extension machinery. (a, b)**

473

Snapshots of PilB-mNG and mNG-FimX fluorescence in WT, *pilG*<sup>-</sup>, *pilH*<sup>-</sup> and *cpdA*<sup>-</sup>

474

background. Scale bar, 5  $\mu$ m (c, d) Normalized fluorescence profiles along the major

475

cell axis of the motor protein PilB and its activator FimX (Extended Data Fig.7a).

476

Solid lines: mean normalized fluorescence profiles across biological replicates.

477

Shaded area: standard deviation across biological replicates. (e, g) Polar localization

478

index of PilB-mNG and mNG-FimX respectively, quantifying the extent of polar signal

479

compared to a diffused configuration (Extended Data Fig.7b). An index of 0 and 1

480

respectively correspond to completely diffuse and polar signals. Relative to WT and

481

*cpdA*<sup>-</sup>, polar localization is higher in *pilH*<sup>-</sup> and lower in *pilG*<sup>-</sup>. (f, h) Symmetry index

482

of PilB-mNG and mNG-FimX respectively, representing the ratio of the brightest pole

483

fluorescence to the total polar fluorescence. 0.5 and 1 respectively correspond to a

484

symmetric bipolar and a unipolar localization. *pilH*<sup>-</sup> has higher symmetry index than

485

WT and *cpdA*<sup>-</sup>. Circles: median of each biological replicate. Black bars: (vertical)

486

mean and (horizontal) standard deviation across biological replicates.

487



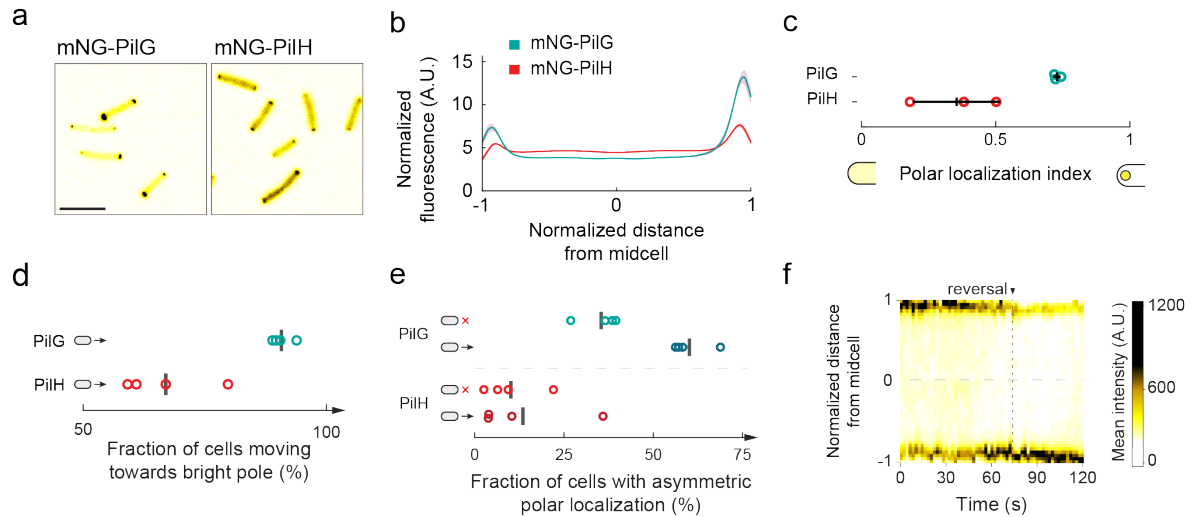

488

489

490

491

492

493

494

495

496

497

498

499

500

501

502

503

504

**Figure 5. PiIG and PiIH dynamic localization establish a local-excitation, global-inhibition signaling landscape. (a)** Snapshots of mNG-PiIG and mNG-PiIH fluorescence. Scale bar, 5  $\mu$ m. **(b)** Comparison of mNG-PiIG and mNG-PiIH normalized mean fluorescent profiles. **(c)** The polar localization index of mNG-PiIG is relatively large showing PiIG is mostly polar. In contrast, mNG-PiIH has a low polar localization index and is thus mostly cytoplasmic. Circles: median of each biological replicate. Black bars: (vertical) mean and (horizontal) standard deviation across biological replicates **(d)** Protein polarization relative to the twitching direction. Cells predominantly move towards the brighter mNG-PiIG pole. The fraction for mNG-PiIH is close to 50 %, corresponding to a random polarization relative to the direction of motion. Black bars: mean across biological replicates **(e)** Comparison of the symmetry of the polar fluorescent foci of moving cells with non-moving cells for mNG-PiIG and mNG-PiIH fusion proteins. There is an enrichment for mNG-PiIG polar asymmetry in moving cells, but no differences in mNG-PiIH. Black bars: mean across biological replicates **(f)** Kymograph of mNG-PiIG in a reversing cell.
